1 **Avian influenza A viruses reassort and diversify differently in mallards and mammals**

2

3 Ketaki Ganti<sup>1#</sup>, Anish Bagga<sup>2#</sup>, Juliana DaSilva<sup>3</sup>, Samuel S. Shepard<sup>3</sup>, John R. Barnes<sup>3</sup>, Susan  
4 Shriner<sup>4</sup>, Katia Koelle<sup>5,6\*</sup> and Anice C. Lowen<sup>1,6\*</sup>

5

6 <sup>1</sup>Department of Microbiology and Immunology, Emory University School of Medicine, Atlanta, GA,  
7 USA

8 <sup>2</sup>Emory College of Arts and Sciences, Atlanta, GA, USA

9 <sup>3</sup>Influenza Division, Center for Disease Control and Prevention, Atlanta, GA, USA

10 <sup>4</sup>National Wildlife Research Center, USDA-APHIS, Fort Collins, CO, USA

11 <sup>5</sup>Department of Biology, Emory University, Atlanta, GA, USA

12 <sup>6</sup>Emory-UGA Center of Excellence for Influenza Research and Surveillance (CEIRS)

13

14 <sup>#</sup>These authors contributed equally

15 <sup>\*</sup>Corresponding authors: [anice.lowen@emory.edu](mailto:anice.lowen@emory.edu), [katia.koelle@emory.edu](mailto:katia.koelle@emory.edu)

16

17

18

19

20

21

22

23

24

25

26

27 **Abstract**

28 Reassortment among co-infecting influenza A viruses (IAVs) is an important source of viral  
29 diversity and can facilitate expansion into novel host species. Indeed, reassortment played a key  
30 role in the evolution of the last three pandemic IAVs. Observed patterns of reassortment within a  
31 coinfecting host are likely to be shaped by several factors, including viral load, the extent of viral  
32 mixing within the host and the stringency of selection. These factors in turn are expected to vary  
33 among the diverse host species that IAV infects. To investigate host differences in IAV  
34 reassortment, here we examined reassortment of two distinct avian IAV within their natural host  
35 (mallards) and a mammalian model system (guinea pigs). Animals were co-inoculated with  
36 *A/wildbird/California/187718-36/2008* (H3N8) and *A/mallard/Colorado/P66F1-5/2008* (H4N6)  
37 viruses. Longitudinal samples were collected from the cloaca of mallards or the nasal tract of  
38 guinea pigs and viral genetic exchange was monitored by genotyping clonal isolates from these  
39 samples. Relative to those in guinea pigs, viral populations in mallards showed higher frequencies  
40 of reassortant genotypes and were characterized by higher genotype richness and diversity. In  
41 line with these observations, analysis of pairwise segment combinations revealed lower linkage  
42 disequilibrium in mallards as compared to guinea pigs. No clear longitudinal patterns in richness,  
43 diversity or linkage disequilibrium were present in either host. Our results reveal mallards to be a  
44 highly permissive host for IAV reassortment and suggest that reduced viral mixing limits avian  
45 IAV reassortment in a mammalian host.

46

47

48

49

50

51

52

## 53 **Introduction**

54 Influenza A viruses (IAVs) infect a broad range of host species. Many diverse lineages circulate  
55 in waterfowl (Anseriformes) and shorebirds (Charadriiformes), with 16 hemagglutinin and 9  
56 neuraminidase subtypes represented. This diverse viral gene pool is the ancestral source of IAV  
57 lineages circulating in poultry, swine, humans and other mammalian hosts (1, 2). Although host  
58 barriers to infection limit the range of hosts within which a given IAV lineage circulates, spillovers  
59 occur occasionally and can seed novel lineages (3, 4). When a novel IAV lineage is established  
60 in humans, the result is a pandemic of major public health consequence (5, 6).

61 The segmented nature of the IAV genome allows facile genetic exchange between viruses that  
62 co-infect the same host: through reassortment of intact gene segments, mixed infections  
63 frequently give rise to viral genotypes that differ from both parental strains (7). The potential for  
64 viral diversification through this mechanism is high. If co-infecting parental viruses differ in all eight  
65 gene segments, reassortment can yield 256 distinct viral genotypes from a single co-infected cell.  
66 However, the contribution of reassortment to IAV diversity can be limited by two major forms of  
67 constraint. The first is a lack of opportunity for reassortment between distinct strains. For  
68 reassortment to occur, viruses must infect the same host and the same cell within that host. These  
69 prerequisites will be met routinely only if viral spread is well-mixed and high density at the  
70 population and within-host levels, respectively. The second form of constraint is negative  
71 selection. Reassortment may be deleterious because it can break epistatic interactions among  
72 gene segments and the proteins they encode. As a result, progeny viruses with chimeric  
73 genotypes can be less fit than both parental strains (8, 9).

74 Despite these constraints, reassortment has repeatedly been implicated in the evolution of novel  
75 IAV lineages and is strongly associated with IAV host switching (10). Reassortment involving  
76 human seasonal strains and IAV adapted to avian and/or swine hosts led to the 1957, 1968, and  
77 most recently, 2009 influenza pandemics. The establishment in poultry of H7N9 and H5N1  
78 subtype viruses that are highly pathogenic to humans followed from reassortment between

79 enzootic poultry viruses and strains introduced transiently from wild birds (11-14). More recently,  
80 reassortment of poultry H5N1 viruses with IAV in wild birds led to the spread of highly pathogenic  
81 H5N8 and H5N2 subtype viruses to North America (15). Thus, reassortment can have major  
82 consequences for IAV evolution and host range expansion.

83 In the work described here, we used experimental IAV coinfection to evaluate the efficiency of  
84 reassortment in mallards, a major natural host of IAV. The viral strains used for coinfection, of  
85 H3N8 and H4N6 subtypes, are typical of viruses isolated from mallards and representative of  
86 lineages co-circulating in North American waterfowl. Both the hemagglutinin (HA) and  
87 neuraminidase (NA) subtypes represented are furthermore associated with frequent mixed  
88 infection within this ecological niche (16). We compared reassortment observed in this natural  
89 host-virus pairing to that seen with the same viral strains in a guinea pig model. In this way, the  
90 impact of host species on the extent of within-host genetic diversity achieved through  
91 reassortment was evaluated. Our results revealed abundant reassortment in mallards, giving rise  
92 to high genotype richness and diversity and low linkage disequilibrium between segments. In  
93 guinea pigs, reassortment rates were lower, fewer unique genotypes were detected and relatively  
94 high prevalence of parental genotypes resulted in low diversity. These findings indicate that  
95 mallards are highly permissive for IAV reassortment, whereas mammalian hosts may present a  
96 less permissive environment for IAV reassortment. Additional analyses suggest that lower levels  
97 of reassortment in guinea pigs stem from reduced viral mixing in this host, rather than pervasive  
98 purifying selection limiting the frequency of reassortants.

99

## 100 **Results**

### 101 **Robust infection in co-inoculated mallards and guinea pigs**

102 The genomes of the two viral strains used for co-infection, influenza A/wildbird/California/187718-  
103 36/2008 (H3N8) and A/mallard/Colorado/P66F1-5/2008 (H4N6) viruses, were sequenced in full  
104 and found to be genetically distinct in all eight segments (**Table 1**). The proteins encoded by these

105 gene segments exhibited between 44.2% and 100% identity in their amino acid composition. The  
106 viral genome sequences were used to design eight segment-specific primer sets suitable for  
107 differentiation of the H3N8 and H4N6 gene segments by high resolution melt analysis.

108 To evaluate the patterns of IAV reassortment *in vivo* and its reliance on host species, groups of  
109 eight mallards and eight guinea pigs were co-inoculated the H3N8 and H4N6 viruses and shed  
110 virus was sampled daily. Viral growth in each species was robust, but differed in the kinetics  
111 observed (**Figure 1**). The average peak titer reached in mallards and guinea pigs was  
112 comparable, at 4.5 and 5.2 log<sub>10</sub>PFU/mL, respectively, although guinea pigs showed a much  
113 broader range of values. Kinetics were more rapid in mallards, with peak viral load seen at the  
114 earliest time point (1 day post-inoculation) and clearance observed at 4 or 5 days post-inoculation.  
115 In guinea pigs, titers generally peaked at 2 days post-inoculation and shedding ceased at 5 days  
116 post-inoculation at the earliest.

117

### 118 **Genotypic diversity was higher in mallards than in guinea pigs**

119 To quantify reassortment following coinfection, clonal isolates were derived from mallard cloacal  
120 swabs collected on days 1, 2 and 3 and from guinea pig nasal washes collected on days 2, 3 and  
121 4. These time points were chosen because all individuals in the respective groups were shedding  
122 above the limit of detection on each of these days. Twenty-one clonal isolates were derived per  
123 sample. Genotyping was then performed for all eight gene segments of these isolates to evaluate  
124 whether they were of H3N8-origin or H4N6-origin. For a small minority of isolates, one or more  
125 gene segments gave an ambiguous result in our genotyping assay and the full isolate was  
126 therefore excluded from the analysis (giving a final sample size of 18-21 isolates per sample). In  
127 all individuals of both species, and at all time points examined, reassortment was detected  
128 (**Supplementary Figure 1**).

129 To characterize the outcomes of IAV coinfection in each host, the genotypes from the clonal  
130 isolates were quantitatively analyzed. Specifically, for each sample collected from a given

131 individual on a given day, the frequency of unique genotypes, frequency of parental genotypes,  
132 genotype richness, and genotype diversity were determined (**Figure 2**). In mallards, the frequency  
133 of a given genotype was variable across time, reflecting infrequent carry-over of specific  
134 reassortant genotypes within a given individual (**Figure 2A** and **Supplementary Figure 2**).  
135 Parental genotypes were detected in each of the mallards on at least one sampling day, with  
136 frequencies on a given day varying between 0 and 0.6 (**Figure 2B**). Genotype richness, or the  
137 number of distinct genotypes detected in a sample, was typically high in mallards, with most  
138 samples showing richness values between 12 and the maximum value of 21 (**Figure 2C**).  
139 Diversity was measured using the Shannon-Weiner index, which considers both richness and  
140 evenness in the frequency with which genotypes are detected. Diversity in mallards tracked  
141 closely with richness and was also high, with all mallards showing diversity values greater than  
142 2.3 on at least one sampling day (**Figure 2D**). Similar to mallards, genotype frequencies in guinea  
143 pigs were variable across time, again reflecting infrequent carry-over of specific reassortant  
144 genotypes (**Figure 2E** and **Supplementary Figure 2**). In striking contrast to mallards, however,  
145 parental genotypes were often predominant in guinea pigs, although the frequencies observed  
146 ranged widely, from 0 to 0.95 (**Figure 2F**). Genotype richness in guinea pigs was generally lower  
147 than that seen in mallards, with most samples comprising fewer than 12 unique genotypes  
148 (**Figure 2G**). Correspondingly, genotype diversity also appeared lower in guinea pigs than in  
149 mallards, with only one of the guinea pigs showing diversity above 2.3 and most values falling in  
150 the range of 0.5 to 2.0 (**Figure 2H**). Lower levels of genotype diversity in guinea pigs than in  
151 mallards were found to be statistically significant ( $p = 1.3 \times 10^{-7}$ ; ANOVA).  
152 In the combined data set from both species, we noted an inverse correlation between diversity  
153 and parental genotype frequency (**Figure 3A**). To test the hypothesis that low diversity is driven  
154 by high parental frequencies, we therefore calculated viral evenness in each sample with and  
155 without the inclusion of parental genotypes. Evenness, rather than diversity, was analyzed in this  
156 way because the reduction in sample size brought about by excluding parental genotypes

157 confounds effects on diversity. Since this exclusion typically has little impact on richness (reducing  
158 the number of unique genotypes by 0-2), any impact on diversity of removing parental genotypes  
159 would occur mainly through changes in evenness. Upon exclusion of parental genotypes,  
160 evenness in guinea pigs increased, while that in mallards was less affected (**Figure 3B, C**).  
161 Nevertheless, evenness was significantly lower in guinea pigs compared to mallards whether  
162 parental genotypes were included or not ( $p=1.47 \times 10^{-5}$  and 0.0166, respectively, unpaired t-test).  
163 Thus, high parental genotype frequency contributes, but does not fully account for reduced viral  
164 diversity in guinea pigs compared to mallards.

165

### 166 **Parental genotypes drive higher linkage disequilibrium in guinea pigs than in mallards**

167 To assess the extent to which reassortment was shaped by genetic linkages among segments,  
168 and whether this effect varied with host species, linkage disequilibrium ( $D$ ) was evaluated for each  
169 pair of viral gene segments. This analysis examines the extent to which segments assorted non-  
170 randomly. For the pairing of PB2 and PB1, for example, four genotypes are possible:  
171  $PB2_{H3N8}PB1_{H3N8}$ ,  $PB2_{H3N8}PB1_{H4N6}$ ,  $PB2_{H4N6}PB1_{H3N8}$ , and  $PB2_{H4N6}PB1_{H4N6}$ . If these four genotypes  
172 are present in a given viral population at the expected frequencies based on the prevalence of  
173 the four gene segments,  $D$  will equal zero, indicative of random assortment. Positive associations,  
174 in which specific genotypes are over-represented, will yield  $D > 0$ , while negative associations will  
175 give  $D < 0$ . In both mallards and guinea pigs, pairwise  $D$  values tended to be positive (**Figure 4**).  
176 Comparison between host species for each pairwise combination revealed that  $D$  was typically  
177 lower in mallards than guinea pigs (Mann Whitney U test,  $p < 0.05$  for 16 of the 28 segment  
178 pairings). While this result could suggest that reassortment in guinea pigs was more strongly  
179 shaped by positive segment associations than that in mallards, high linkage disequilibrium could  
180 alternatively be driven by a lack of opportunity for reassortment, leading to frequent occurrence  
181 of parental segment pairings.

182

## 183 **Genotype patterns are consistent with random sampling of gene segments**

184 To gauge whether the lower levels of reassortment in guinea pigs compared to ducks is due to a  
185 lack of reassortment opportunity versus more stringent selection in guinea pigs, we assessed the  
186 types of reassortants that were observed in guinea pigs and in mallards. Reasoning that less  
187 chimeric genotypes, in which only one or two segments are derived from a second parent strain,  
188 would be less likely to suffer fitness defects due to epistasis, we tested the hypothesis that such  
189 reassortants were over-represented in our data sets relative to others, and that they would be  
190 particularly overrepresented in guinea pigs relative to mallards. The extent to which a viral  
191 genotype was chimeric was quantified by the number of gene segments stemming from the  
192 parental virus that contributed fewer gene segments to the genotype. Viral genotypes were thus  
193 categorized as having between 0 and 4 minority segments. We further quantified the total number  
194 of unique viral genotypes that belonged to each of these categories. All possible genotypes in a  
195 given category were typically not observed, with the exceptions of the 0 minority segments  
196 category (which includes only the two parental genotypes) and the 1 minority segment category  
197 in mallards (**Figure 5A**). To test whether the distribution of observed genotypes across the five  
198 categories may be due to selection, we calculated the proportion of possible genotypes that were  
199 detected in each category and compared these results to a simulated dataset (**Figure 5B**). The  
200 simulated data were generated by sampling segments at random from the set of reassortant  
201 genotypes observed in each animal. Genotypes with one minority segment tended to be more  
202 prevalent in observed compared to simulated datasets, but this trend was not statistically  
203 significant owing to wide confidence intervals in the simulated data sets (**Figure 5B**). Conversely,  
204 more highly chimeric genotypes occurred less often in observed compared to simulated datasets.  
205 This trend was statistically significant for genotypes with three or four minority gene segments in  
206 guinea pigs and for those with three minority segments in mallards. Thus, observed genotype  
207 patterns likely resulted from a combination of limited availability of certain segments in a given  
208 host and purifying selection acting more strongly on reassortant genotypes in the three and four



209 minority gene segment categories. Evidence for selection was, however, stronger in guinea pigs  
210 than mallards. In comparing mallards and guinea pigs, it is also clear that higher proportions of  
211 genotypes in each reassortant category were detected in mallards. This effect was recapitulated  
212 in the simulated dataset, however, indicating that this species-specific effect is a simple  
213 manifestation of increased genotype richness in mallards.

214

## 215 **Discussion**

216 Through experimental coinfection of mallards and guinea pigs with distinct IAVs typical of those  
217 that circulate widely in North American ducks, we examined the efficiency of IAV genetic  
218 exchange in both a natural host (mallard) and a model mammalian host (guinea pig). Robust  
219 reassortment was apparent in mallards, giving rise to highly diverse viral populations within  
220 coinfecting individuals. In contrast, reassortant genotypes were less common in guinea pigs. In  
221 both hosts, temporal trends in the frequency of specific or overall reassortant genotypes were not  
222 apparent. Little recurrence of reassortant genotypes across individuals was apparent, suggesting  
223 that stochastic processes were more potent than selection in shaping within-host viral  
224 populations.

225 Low diversity in guinea pigs may result from relatively little opportunity for reassortment,  
226 negative selection of less fit variants, or a combination of both. Our analyses suggest that a  
227 combination of these two factors is at play in guinea pigs. If opportunity for reassortment is low,  
228 owing to low rates of coinfection, this would not only favor maintenance of parental genotypes,  
229 but would also lead to out-growth of reassortants that form and then are propagated without  
230 further coinfection. Low evenness among reassortant genotypes detected in guinea pigs is  
231 therefore consistent with limited opportunity for reassortment. Furthermore, stochastic outgrowth  
232 of reassortants would lead to over-representation of differing reassortant genotypes in unrelated  
233 individuals. In line with this expectation, recurrent detection of reassortant genotypes across  
234 different individuals was not a major feature of the dataset. One exception to this generalization

235 was seen: a reassortant combining the NP segment of the H4N6 parent with seven segments  
236 from the H3N8 parent and was detected repeatedly in six of eight guinea pigs. More broadly,  
237 however, the reassortant genotypes detected in guinea pigs suggest that their propagation was  
238 largely a stochastic process and not the result of positive selection. Evidence of negative selection  
239 was, however, seen with the observation that highly chimeric genotypes were under represented  
240 in guinea pigs. Together, the data support roles for both stochastic and selective forces shaping  
241 reassortment patterns in guinea pigs.

242 In contrast to guinea pigs, the viral genotypic diversity observed in coinfecting mallards is  
243 consistent with abundant opportunity for reassortment and minimal within host selection. Several  
244 lines of evidence point to this conclusion. While parental genotypes were routinely detected, they  
245 did not predominate. Both high richness and high evenness contributed to diverse within-host  
246 viral populations. Pairwise linkage disequilibrium was low in mallards, suggesting that  
247 heterologous gene segment combinations were not strongly deleterious to viral fitness. Similarly,  
248 the reassortant gene constellations detected were largely consistent with random sampling of  
249 gene segments. The data clearly reveal mallards to be highly permissive hosts for influenza viral  
250 genetic exchange.

251 The evolutionary implications of robust genetic exchange within the mallard host are  
252 dependent on viral dynamics at larger scales of biological organization. For example, the extent  
253 of viral mixing within host populations is a major determinant of the frequency with which  
254 coinfections occur. Field studies indicate that this potential constraint is not strong in mallards.  
255 Within flyways, the migratory patterns of mallards and other waterfowl allow diverse IAV to be  
256 brought together at common migratory stopover points and over-wintering sites (16-19). One  
257 study revealed that, among 167 wild bird samples analyzed, 26% showed evidence of more than  
258 one subtype, indicative of mixed infection (20). Recent examination of a much broader dataset  
259 revealed mixed infection within North American waterfowl to be more common in winter, with

260 multiple HA/NA subtypes detected in 3% of all isolates and 13% of winter isolates (16). Thus,  
261 within flyways, IAV mixing at the population level occurs readily in wild birds.

262 A second feature of viral dynamics that determines the potential for reassortants to impact  
263 larger scale evolutionary trends is the tightness of the bottleneck governing transmission between  
264 hosts. While IAV transmission bottlenecks are thought to be stringent in mammalian hosts (21,  
265 22), formal analysis of the bottleneck in waterfowl has not been undertaken to date. Since IAV  
266 transmission in these birds occurs through a fecal-oral route, rather than a respiratory route as  
267 seen in mammals, the existence of a substantially wider bottleneck is plausible.

268 A third, and critical, factor in considering the potential for abundant within-host reassortment  
269 to impact population-level viral evolution is the distribution of fitness effects that results from  
270 reassortment. The fitness effects of both inter- and intra-subtype reassortment of human IAV is  
271 generally deleterious (8, 9). These negative fitness effects are readily explained by the disruption  
272 of inter-segment interactions: as constellations of viral genes co-evolve, the genetic under-  
273 pinnings of epistatic interactions become lineage-specific and, as a result, reassortment breaks  
274 this epistasis (23). Interestingly, the consequences of genetic exchange may be very different for  
275 IAV circulating in wild waterfowl. In this ecological niche, IAV reassortment is frequently detected  
276 at the population level (20, 24-28). In particular, incongruence among the phylogenies of different  
277 IAV gene segments indicates that their evolution does not occur in concert; rather, gene  
278 constellations are routinely disrupted through reassortment. In the absence of stable gene  
279 constellations, there may be little opportunity for divergent epistatic interactions to evolve. Instead,  
280 the gene segments of avian IAV appear to exist as functionally-equivalent and readily  
281 interchangeable units (20). In stark contrast to IAV circulating in humans, reassortants that form  
282 in wild birds are not subjected to strong negative selection and circulate widely.

283 The observation herein of robust IAV reassortment within individual mallards strongly  
284 suggests that free-mixing and prevalent coinfection within mallard hosts contributes to the  
285 abundant IAV reassortment observed at the population level. Over multiple scales of biological

286 organization, IAV dynamics in mallards (and likely other members of the Anseriformes) appear to  
287 overcome both spatial and selective constraints to support production, onward transmission and  
288 broad circulation of reassortant viruses.

289

## 290 **Materials and Methods**

### 291 **Virus isolation and propagation**

292 The viruses used in this study were originally isolated from wild bird environmental samples as  
293 part of US surveillance for avian IAV in wild birds conducted between 2006-2009 (29). Fresh wild  
294 bird feces were collected using Dacron swabs and stored in BA-1 viral transport medium. Samples  
295 were tested by RT PCR and positive samples were inoculated into the allantoic cavity of 11-day  
296 old embryonated hen eggs at 37°C for virus isolation (30). Virus subtypes were confirmed by  
297 hemagglutination inhibition and neuraminidase inhibition tests at the National Veterinary Services  
298 Laboratory (Ames, Iowa).

299 The H3N8 virus stock, A/wildbird/CA/187718-36/08, was propagated in hen eggs from the  
300 original environmental sample as described above. The H4N6 virus, A/mallard/CO/P66F1-5/08,  
301 was also propagated in hen eggs from the original sample but was then passaged through a  
302 mallard. A fecal sample from that mallard was propagated in hen eggs. Allantoic fluid was  
303 harvested and pooled for each virus, and aliquots were stored at -80°C prior to use. Egg Infectious  
304 Dose 50 (EID<sub>50</sub>) titers were determined using the Reed & Muench (1938) method.

305

### 306 **Whole genome sequencing and primer design**

307 The complete viral genomes for both the H3N8 and H4N6 viruses were sequenced at the CDC  
308 Influenza Division using an Illumina sequencing platform. Briefly, viral RNA was extracted from  
309 virus stocks using the Qiagen Viral RNA Mini Kit (Qiagen) and was used as a template for multi-  
310 segment RT PCR as described previously (31). The sequence reads were assembled using the

311 IRMA v 0.9.1 pipeline (32). The complete sequences were submitted to GenBank (MT982372-79  
312 (H4N6); MT982380-87 (H3N8)).

313 Primers to distinguish H3N8 and H4N6 gene segments were designed based on these sequences  
314 (**Table 2**). The six non-HA, non-NA segments were typed using high resolution melt analysis.  
315 Primers anneal to conserved sequences of each segment and direct amplification of an  
316 approximately 100 bp region, which contains one to five nucleotide differences between the two  
317 viruses. These nucleotide differences confer distinct melting properties on the cDNA. Because  
318 the HA and NA segments are highly divergent, high resolution melt analysis is not feasible. For  
319 these segments, virus-specific primers were generated to enable genotyping by standard RT  
320 qPCR.

321

## 322 **Cells**

323 Madin Darby canine kidney (MDCK) cells from Dr. Daniel Perez at University of Georgia were  
324 used for plaque assay. The cells were maintained in minimal essential medium (Gibco)  
325 supplemented with 10% fetal bovine serum (FBS; Atlanta Biologicals), penicillin (100 IU), and  
326 streptomycin (100  $\mu\text{g ml}^{-1}$ ; PS; Corning). All cells were cultured at 37°C and 5% CO<sub>2</sub> in a  
327 humidified incubator. Cells were tested monthly for mycoplasma contamination while in use.

328

## 329 **Animal models**

330 All animal experiments were conducted in accordance with the Guide for the Care and Use of  
331 Laboratory Animals of the National Institutes of Health. The studies were conducted under animal  
332 biosafety level 2 containment and were approved by the Institutional Animal Care and Use  
333 Committee (IACUC) of the US Department of Agriculture, Animal and Plant Health Inspection  
334 Service, Wildlife Services, National Wildlife Research Center (NWRC), Fort Collins, CO, USA  
335 (approval NWRC QA-1621) for the mallards (*Anas platyrhynchos*) and the IACUC of Emory  
336 University (protocol PROTO201700595) for the guinea pigs (*Cavia porcellus*) studies. The

337 animals were humanely euthanized following guidelines approved by the American Veterinary  
338 Medical Association.

339

#### 340 **Experimental infection of mallards**

341 Mallards were purchased from Field Trial Gamebirds in Fort Collins, CO and were approximately  
342 5-6 months old at the time of testing. Prior to inoculation, all birds were confirmed to be negative  
343 for influenza A virus antibodies by bELISA (33) and for viral RNA by RT-PCR. During testing, all  
344 birds (n=8) were housed at the NWRC in an indoor aviary equipped with ten 2.1 m x 2.1 m x 2.4  
345 m pens separated by 1.27 cm x 7.62 cm PVC-coated wire mesh. Birds were housed in groups of  
346 three or four per pen and could roam freely within the pen. Each pen included a food bowl, a water  
347 bowl, a small bowl of grit, and a water-filled 375 L oval stock tank for swimming and preening.  
348 The H3N8 and H4N6 inoculums were prepared to  $10^5$  EID<sub>50</sub>/mL by diluting stocks with negative  
349 allantoic fluid. Birds were inoculated oro-choanally using a P1000 pipet with 1 ml H3N8 and 1 ml  
350 H4N6 virus preparations. Cloacal swabs were collected daily from all birds and placed in 1 ml BA-  
351 1 viral transport medium and stored at -80°C until laboratory testing.

352

353 **Experimental infection of guinea pigs:** Female Hartley strain guinea pigs weighing 250–350 g  
354 were obtained from Charles River Laboratories and housed by Emory University Department of  
355 Animal Resources. Before intranasal inoculation and nasal washing, the guinea pigs were  
356 anaesthetized with 30 mg kg<sup>-1</sup> ketamine and 4 mg kg<sup>-1</sup> xylazine by intramuscular injection. The  
357 guinea pigs (n=8) were inoculated intranasally with the H3N8 and H4N6 virus mixture in PBS at  
358 a dose of  $10^5$  pfu of each virus in a total inoculation volume of 300 µl. Animals were singly housed  
359 in filter top covered rat cages with food and water provided ad libitum. Daily nasal washes were  
360 collected in 1 ml PBS and stored at -80°C until laboratory testing.

361

362

363 **Determination of viral loads**

364 Viral loads in mallard cloacal swab samples and guinea pig nasal wash samples were determined  
365 by standard plaque assay on MDCK cells. Briefly, one aliquot was thawed, mixed well and  
366 subjected to 10-fold serial dilution in PBS. Dilutions  $10^{-1}$  to  $10^{-6}$  were then used to inoculate  
367 confluent MDCK cells in 6-well plates. Following a one-hour attachment period, inoculum was  
368 removed, monolayers were washed with PBS and serum-free culture medium containing 0.6%  
369 Oxoid agar was overlaid onto the cells. Cultures were incubated for two days at 37°C, at which  
370 time plaques were counted and titer determined by taking into account the initial dilution of the  
371 sample. The limit of detection of the plaque assay is 50 PFU/mL, equivalent to one plaque from  
372 the  $10^{-1}$  dilution.

373

374 **Quantification of reassortment**

375 Reassortment levels were evaluated by genotyping 21 virus isolates per sample from mallard  
376 cloacal swabs and guinea pig nasal washes, as described previously (7). Based on positivity for  
377 infectious IAV in all eight animals, samples from days 1, 2 and 3 were chosen for evaluation of  
378 reassortment in mallards, while samples from days 2, 3 and 4 were chosen for guinea pigs.

379 Briefly, plaque assays were performed on MDCK cells in 10 cm diameter dishes to isolate virus  
380 clones. Serological pipettes (1 ml) were used to collect agar plugs from well-separated plaques  
381 into 160  $\mu$ l PBS. Using a ZR-96 viral RNA kit (Zymo), RNA was extracted from the agar plugs and  
382 eluted in 40  $\mu$ l nuclease-free water (Invitrogen). Reverse transcription was performed with a  
383 universal IAV primer (31) using Maxima reverse transcriptase (RT; Thermofisher) according to  
384 the manufacturer's protocol. The resulting cDNA was diluted 1:4 in nuclease-free water, each  
385 cDNA was combined with segment-specific primers (**Table 2**) and Precision Melt Supermix (Bio-  
386 Rad) and analyzed by qPCR using a CFX384 Touch real-time PCR detection system (Bio-Rad).  
387 The qPCR was followed by high-resolution melt analysis to differentiate the H3N8 and H4N6  
388 amplicons of the six non-HA, non-NA segments. Precision Melt Analysis software (Bio-Rad) was



389 used to determine the parental virus origin of each gene segment based on the melting properties  
390 of the cDNA fragments and comparison to H3N8 and H4N6 virus controls. For the HA and NA  
391 gene segments, Ct values were used to determine the origin of each segment. Ct values  $\geq 32$   
392 were considered negative. Each plaque was assigned a genotype based on the combination of  
393 H3N8 and H4N6 genome segments, with two variants of each of the eight segments allowing for  
394 256 potential genotypes. In a minority of samples, the origin of one or more gene segments could  
395 not be determined and the genotype from that clonal isolate was removed from the analysis.

396

### 397 **Software**

398 All calculations, plotting, and machine learning was done through Python 3 (34). Packages used  
399 included matplotlib (35), NumPy (36), pandas (37), SciPy (38) and statsmodels (39).

400

### 401 **Genotype Frequencies, Richness, Diversity, and Evenness**

402 Here, a virus genotype is defined as a unique combination of the eight IAV segments, where each  
403 segment is derived from either the H3N8 or H4N6 parental virus. In total, there are  $2^8$  (=256)  
404 possible unique genotypes. Genotype frequencies were calculated for each sample by dividing  
405 the number of appearances of each genotype by the total number of clonal isolates available for  
406 that sample.

407 Genotype richness ( $S$ ) is given by the number of unique virus genotypes in a sample.

408 Genotype diversity was quantified using the Shannon-Wiener Index:

$$409 \quad H' = - \sum_{i=1}^S (p_i \ln p_i)$$

410 where  $S$  is genotype richness and  $p_i$  is the frequency of genotype  $i$  in the sample (40). With a  
411 range between 0 and 1, genotype evenness is defined as the extent to which genotypes are  
412 evenly present in a sample, with 1 corresponding to maximum evenness (41). Evenness is given  
413 by:



414 
$$\frac{H'}{H'_{max}}$$

415 where maximum genotype diversity  $H'_{max}$  evaluates to  $\ln S$  in a sample with genotype richness  $S$ .  
416 Evenness values were calculated both with and without the parental genotypes included in the  
417 samples. In the evenness calculations that excluded parental genotypes, genotype frequencies,  
418 richness  $S$ , diversity  $H'$  and maximum diversity  $H'_{max}$  values were all recalculated using the subset  
419 of clonal isolates that were not parental genotypes.

420

### 421 **Linkage Disequilibrium**

422 Linkage disequilibrium  $D$  is a population genetic measure that quantifies the extent of non-random  
423 association of alleles at two or more loci in a population (42). Here we use  $D$  to characterize non-  
424 random associations of gene segments.  $D$  was calculated for all 8-choose-2 (= 28) possible two  
425 gene segment combinations using the formula:

426 
$$D = p\{i, H3N8\}, \{j, H3N8\} - p\{i, H3N8\}p\{j, H3N8\}$$

427 where  $p\{i, H3N8\}$  is the proportion of clonal isolates that have gene segment  $i$  derived from  
428 parental virus H3N8  $p\{j, H3N8\}$  is the proportion of clonal isolates that have gene segment  $j$   
429 derived from parental virus H3N8, and  $p\{i, H3N8\}, \{j, H3N8\}$  is the proportion of the clonal isolates  
430 have both gene segments  $i$  and  $j$  derived from parental virus H3N8. Calculations of  $D$  using H4N6  
431 as the reference virus instead of H3N8 yield equivalent results.

432

### 433 **Minority Segments, Unique Genotypes, and Simulation**

434 To identify potential purifying selection in mallards and guinea pigs, an analysis of the genotypes  
435 in terms of the number of minority segments was conducted. We define a minority segment as a  
436 segment derived from the virus that contributes fewer gene segments to a genotype. Each  
437 observed genotype can thus be classified as falling into a category of containing between 0 and

438 4 minority gene segments. Figure 5A shows the number of virus genotypes that fall into each of  
439 these minority gene segment categories.

440 To determine if selection acted against more chimeric genotypes, the proportion of genotypes in  
441 each minority gene segment category was first calculated by dividing the observed number of  
442 genotypes in that category by the number of theoretically possible genotypes in that category  
443 (Figure 5B). To determine whether these calculated proportions deviated from what would be  
444 expected by chance, we generated simulated data for both mallards and guinea pigs that reflected  
445 chance expectations. Specifically, during a round of simulation, all clonal isolates containing  
446 parental genotypes were first excluded from each of the samples. The remaining clonal isolates  
447 were then randomly permuted by gene segment to generate a simulated data set. If the simulated  
448 data set contained any parental genotypes, the data set would be tossed and another one  
449 generated. 1000 simulated data sets were generated in total. Each of these resultant simulated  
450 data sets were analyzed similarly to the observed data sets.

451

## 452 **Statistical Measures**

453 All confidence intervals were calculated via the `proportion_confint` method from the `statsmodels`  
454 package (39). Unpaired t-tests were conducted via the `ttest_rel` and the `ttest_ind` methods  
455 respectively from the `SciPy` package (38). Mann-Whitney U tests were conducted with the  
456 `mannwhitneyu` method and ANOVA tests were conducted with the `f_oneway` method, both of  
457 which are found in the `SciPy` package (38).

458

## 459 **Acknowledgements**

460 This work was funded by the National Institute of Allergy and Infectious Disease through R01  
461 AI127799 and the Centers of Excellence for Influenza Research and Surveillance (CEIRS)  
462 contract no. HHSN272201400004C.

463

464 **Figure Legends**

465

466 **Figure 1: Efficient viral replication was observed in mallards and guinea pigs.** Infectious  
467 viral titers in A) cloacal swab samples collected from mallards and B) nasal lavage samples  
468 collected from guinea pigs are plotted against day post-inoculation. Each colored line represents  
469 an individual animal. Horizontal dashed line shows the limit of detection.

470

471 **Figure 2: Viral populations in mallards showed lower frequencies of parental genotypes,**  
472 **higher genotype richness and higher diversity than those in guinea pigs.** Results from  
473 mallards are shown in panels A-D and from guinea pigs in panels E-H. A, E) Stacked plot showing  
474 frequencies of unique genotypes detected in one representative animal over time. The lowermost  
475 two sections, in blue and orange, represent the H3N8 and H4N6 parental genotypes, respectively.  
476 B, F) Frequency of parental genotypes over time. The total frequency of H3N8 and H4N6 parental  
477 genotypes is plotted. C, G) Genotype richness over time. D, H) Diversity over time, as measured  
478 by the Shannon-Weiner index.

479

480 **Figure 3: Lower levels of viral diversity in guinea pigs is only partially accounted for by**  
481 **high frequency of parental genotypes.** A) Scatter plot of Shannon-Weiner diversity against  
482 parental genotype frequency. B) Histograms showing evenness of virus samples in mallards. C)  
483 Histograms showing evenness of virus samples in mallards, following removal of parental  
484 genotypes. D) Histograms showing evenness of virus samples in guinea pigs. E) Histograms  
485 showing evenness of virus samples in guinea pigs, following removal of parental genotypes.

486

487 **Figure 4: Pairwise linkage disequilibrium was typically lower in mallards than in guinea**  
488 **pigs.** Linkage disequilibrium for each pairwise combination of IAV gene segments is shown. Each

489 data point represents a mallard or guinea pig, with samples from all three time points aggregated  
490 for a given individual. P values indicate results of a Mann Whitney U test.

491

492 **Figure 5: Genotype patterns detected in mallards and guinea pigs are consistent with**

493 **random sampling of gene segments.** A) Number of theoretically possible unique genotypes in

494 each category (brown) and the number detected in mallards (olive) and guinea pigs (grey). Data

495 from all time points and all individuals of a given host species are combined. Number of unique

496 genotypes is displayed above each bar. B) Proportion of unique genotypes in each category that

497 were detected. Observed results in mallards (solid, olive line) and guinea pigs (solid, grey line)

498 are compared to simulated data sets generated by randomly sampling segments from reassortant

499 viruses detected in each species (dashed lines). Error bars on the simulated data show the 95%

500 range of calculated proportions from the 1000 simulated data sets.

501

502 **Supplementary Figure Legends**

503 **Supplementary Figure 1: Viral genotypes detected in mallards and guinea pigs.**

504 Viral genotypes detected in mallards (A) and guinea pigs (B) are depicted with H4N6 parental

505 origin in blue and H3N8 parental origin in orange. Each table corresponds to a sample collected

506 from an individual animal on a given day, with columns representing the eight viral gene segments

507 ordered 1-8 from left to right and rows showing clonal isolates. Tables are sorted such that any

508 parental genotypes appear at the top (H4N6) or bottom (H3N8).

509

510 **Supplementary Figure 2: Viral genotype frequencies detected in mallards and guinea pigs.**

511 Stacked plots showing frequencies of unique genotypes detected in each animal over time. The

512 lowermost two sections, in blue and orange, represent the H3N8 and H4N6 parental genotypes,

513 respectively.

514

## 515 References

- 516 1. Webster RG, Hinshaw VS, Bean WJ, Jr., Turner B, Shortridge KF. 1977. Influenza viruses  
517 from avian and porcine sources and their possible role in the origin of human pandemic  
518 strains. *Dev Biol Stand* 39:461-8.
- 519 2. Wright PF, Neumann G, Kawaoka Y. 2006. Orthomyxoviruses, p 1691-1740. *In* Knipe  
520 DMH, P. M. (ed), *Fields Virology*, vol 1. Lippincott-Raven, Philadelphia.
- 521 3. Webster RG, Bean WJ, Gorman OT, Chambers TM, Kawaoka Y. 1992. Evolution and  
522 ecology of influenza A viruses. *Microbiol Rev* 56:152-79.
- 523 4. Webster RG, Shortridge KF, Kawaoka Y. 1997. Influenza: interspecies transmission and  
524 emergence of new pandemics. *FEMS Immunol Med Microbiol* 18:275-9.
- 525 5. Taubenberger JK, Morens DM. 2006. 1918 Influenza: the mother of all pandemics. *Emerg*  
526 *Infect Dis* 12:15-22.
- 527 6. Viboud C, Miller M, Olson D, Osterholm M, Simonsen L. 2010. Preliminary Estimates of  
528 Mortality and Years of Life Lost Associated with the 2009 A/H1N1 Pandemic in the US  
529 and Comparison with Past Influenza Seasons. *PLoS Curr* doi:k/-/35hpbywfdw4n/8  
530 [pii]:RRN1153.
- 531 7. Marshall N, Priyamvada L, Ende Z, Steel J, Lowen AC. 2013. Influenza virus reassortment  
532 occurs with high frequency in the absence of segment mismatch. *PLoS Pathog*  
533 9:e1003421.
- 534 8. Phipps KL, Marshall N, Tao H, Danzy S, Onuoha N, Steel J, Lowen AC. 2017. Seasonal  
535 H3N2 and 2009 Pandemic H1N1 Influenza A Viruses Reassort Efficiently but Produce  
536 Attenuated Progeny. *J Virol* 91.
- 537 9. Villa M, Lassig M. 2017. Fitness cost of reassortment in human influenza. *PLoS Pathog*  
538 13:e1006685.
- 539 10. Ma EJ, Hill NJ, Zabilansky J, Yuan K, Runstadler JA. 2016. Reticulate evolution is favored  
540 in influenza niche switching. *Proc Natl Acad Sci U S A* 113:5335-9.
- 541 11. Lam TT, Wang J, Shen Y, Zhou B, Duan L, Cheung CL, Ma C, Lycett SJ, Leung CY, Chen  
542 X, Li L, Hong W, Chai Y, Zhou L, Liang H, Ou Z, Liu Y, Farooqui A, Kelvin DJ, Poon LL,  
543 Smith DK, Pybus OG, Leung GM, Shu Y, Webster RG, Webby RJ, Peiris JS, Rambaut A,  
544 Zhu H, Guan Y. 2013. The genesis and source of the H7N9 influenza viruses causing  
545 human infections in China. *Nature* 502:241-4.
- 546 12. Wu A, Su C, Wang D, Peng Y, Liu M, Hua S, Li T, Gao GF, Tang H, Chen J, Liu X, Shu  
547 Y, Peng D, Jiang T. 2013. Sequential Reassortments Underlie Diverse Influenza H7N9  
548 Genotypes in China. *Cell Host Microbe* 4:446-52.
- 549 13. Li KS, Guan Y, Wang J, Smith GJ, Xu KM, Duan L, Rahardjo AP, Puthavathana P,  
550 Buranathai C, Nguyen TD, Estoepongastie AT, Chaisingh A, Auewarakul P, Long HT,  
551 Hanh NT, Webby RJ, Poon LL, Chen H, Shortridge KF, Yuen KY, Webster RG, Peiris JS.  
552 2004. Genesis of a highly pathogenic and potentially pandemic H5N1 influenza virus in  
553 eastern Asia. *Nature* 430:209-13.
- 554 14. Bui C, Bethmont A, Chughtai AA, Gardner L, Sarkar S, Hassan S, Seale H, MacIntyre CR.  
555 2016. A Systematic Review of the Comparative Epidemiology of Avian and Human  
556 Influenza A H5N1 and H7N9 - Lessons and Unanswered Questions. *Transbound Emerg*  
557 *Dis* 63:602-620.
- 558 15. Hall JS, Dusek RJ, Spackman E. 2015. Rapidly Expanding Range of Highly Pathogenic  
559 Avian Influenza Viruses. *Emerg Infect Dis* 21:1251-2.
- 560 16. Diskin ER, Friedman K, Krauss S, Nolting JM, Poulson RL, Slemmons RD, Stallknecht DE,  
561 Webster RG, Bowman AS. 2020. Subtype Diversity of Influenza A Virus in North American  
562 Waterfowl: a Multidecade Study. *J Virol* 94.
- 563 17. Lam TT, Ip HS, Ghedin E, Wentworth DE, Halpin RA, Stockwell TB, Spiro DJ, Dusek RJ,  
564 Bortner JB, Hoskins J, Bales BD, Yparraguirre DR, Holmes EC. 2012. Migratory flyway

- 565 and geographical distance are barriers to the gene flow of influenza virus among North  
566 American birds. *Ecol Lett* 15:24-33.
- 567 18. Krauss S, Walker D, Pryor SP, Niles L, Chenghong L, Hinshaw VS, Webster RG. 2004.  
568 Influenza A viruses of migrating wild aquatic birds in North America. *Vector Borne Zoonotic*  
569 *Dis* 4:177-89.
- 570 19. Hill NJ, Ma EJ, Meixell BW, Lindberg MS, Boyce WM, Runstadler JA. 2016. Transmission  
571 of influenza reflects seasonality of wild birds across the annual cycle. *Ecol Lett* 19:915-25.
- 572 20. Dugan VG, Chen R, Spiro DJ, Sengamalay N, Zaborsky J, Ghedin E, Nolting J, Swayne  
573 DE, Runstadler JA, Happ GM, Senne DA, Wang R, Slemmons RD, Holmes EC,  
574 Taubenberger JK. 2008. The evolutionary genetics and emergence of avian influenza  
575 viruses in wild birds. *PLoS Pathog* 4:e1000076.
- 576 21. McCrone JT, Woods RJ, Martin ET, Malosh RE, Monto AS, Lauring AS. 2018. Stochastic  
577 processes constrain the within and between host evolution of influenza virus. *Elife* 7.
- 578 22. Varble A, Albrecht RA, Backes S, Crumiller M, Bouvier NM, Sachs D, Garcia-Sastre A,  
579 tenOever BR. 2014. Influenza A virus transmission bottlenecks are defined by infection  
580 route and recipient host. *Cell Host Microbe* 16:691-700.
- 581 23. Lowen AC. 2017. Constraints, Drivers, and Implications of Influenza A Virus  
582 Reassortment. *Annu Rev Virol* 4:105-121.
- 583 24. Wille M, Tolf C, Avril A, Latorre-Margalef N, Wallerstrom S, Olsen B, Waldenstrom J. 2013.  
584 Frequency and patterns of reassortment in natural influenza A virus infection in a reservoir  
585 host. *Virology* 443:150-60.
- 586 25. Deng G, Tan D, Shi J, Cui P, Jiang Y, Liu L, Tian G, Kawaoka Y, Li C, Chen H. 2013.  
587 Complex reassortment of multiple subtypes of avian influenza viruses in domestic ducks  
588 at the dongting lake region of china. *J Virol* 87:9452-62.
- 589 26. Hatchette TF, Walker D, Johnson C, Baker A, Pryor SP, Webster RG. 2004. Influenza A  
590 viruses in feral Canadian ducks: extensive reassortment in nature. *J Gen Virol* 85:2327-  
591 2337.
- 592 27. Macken CA, Webby RJ, Bruno WJ. 2006. Genotype turnover by reassortment of  
593 replication complex genes from avian influenza A virus. *J Gen Virol* 87:2803-2815.
- 594 28. Venkatesh D, Poen MJ, Bestebroer TM, Scheuer RD, Vuong O, Chkhaidze M,  
595 Machabishvili A, Mamuchadze J, Ninua L, Fedorova NB, Halpin RA, Lin X, Ransier A,  
596 Stockwell TB, Wentworth DE, Kriti D, Dutta J, van Bakel H, Puranik A, Slomka MJ, Essen  
597 S, Brown IH, Fouchier RAM, Lewis NS. 2018. Avian Influenza Viruses in Wild Birds: Virus  
598 Evolution in a Multihost Ecosystem. *J Virol* 92.
- 599 29. Deliberto TJ, Swafford SR, Nolte DL, Pedersen K, Lutman MW, Schmit BB, Baroch JA,  
600 Kohler DJ, Franklin A. 2009. Surveillance for highly pathogenic avian influenza in wild  
601 birds in the USA. *Integr Zool* 4:426-39.
- 602 30. Szretter KJ, Balish AL, Katz JM. 2006. Influenza: propagation, quantification, and storage.  
603 *Curr Protoc Microbiol* Chapter 15:Unit 15G 1.
- 604 31. Zhou B, Wentworth DE. 2012. Influenza A virus molecular virology techniques. *Methods*  
605 *Mol Biol* 865:175-92.
- 606 32. Shepard SS, Meno S, Bahl J, Wilson MM, Barnes J, Neuhaus E. 2016. Viral deep  
607 sequencing needs an adaptive approach: IRMA, the iterative refinement meta-assembler.  
608 *BMC Genomics* 17:708.
- 609 33. Sullivan HJ, Blitvich BJ, VanDalen K, Bentler KT, Franklin AB, Root JJ. 2009. Evaluation  
610 of an epitope-blocking enzyme-linked immunosorbent assay for the detection of  
611 antibodies to influenza A virus in domestic and wild avian and mammalian species. *J Virol*  
612 *Methods* 161:141-6.
- 613 34. Van Rossum G, Drake FL. 2009. Python 3 Reference Manual. CreateSpace, Scotts  
614 Valley, CA.



- 615 35. Hunter JD. 2007. Matplotlib: A 2D Graphics Environment. *Computing in Science &*  
616 *Engineering* 9:90-95.
- 617 36. Oliphant TE. 2006. *A guide to NumPy vol 1*. Trelgol Publishing, USA.
- 618 37. McKinney W. 2010. Data structures for statistical computing in python. *Proceedings of the*  
619 *9th Python in Science Conference* 445:51-56.
- 620 38. Virtanen P, Gommers R, Oliphant TE, Haberland M, Reddy T, Cournapeau D, Burovski  
621 E, Peterson P, Weckesser W, Bright J, van der Walt SJ, Brett M, Wilson J, Millman KJ,  
622 Mayorov N, Nelson ARJ, Jones E, Kern R, Larson E, Carey CJ, Polat I, Feng Y, Moore  
623 EW, VanderPlas J, Laxalde D, Perktold J, Cimrman R, Henriksen I, Quintero EA, Harris  
624 CR, Archibald AM, Ribeiro AH, Pedregosa F, van Mulbregt P, SciPy C. 2020. SciPy 1.0:  
625 fundamental algorithms for scientific computing in Python. *Nat Methods* 17:261-272.
- 626 39. Seabold S, Perktold J. 2010. statsmodels: Econometric and statistical modeling with  
627 python. *9th Python in Science Conference* doi:10.25080/Majora-92bf1922-011.
- 628 40. Spellerberg IF, Fedor PJ. 2003. A tribute to Claude Shannon (1916–2001) and a plea for  
629 more rigorous use of species richness, species diversity and the ‘Shannon–Wiener’ Index.  
630 *Global Ecology and Biogeography* 12:177-179.
- 631 41. Grunwald NJ, Goodwin SB, Milgroom MG, Fry WE. 2003. Analysis of genotypic diversity  
632 data for populations of microorganisms. *Phytopathology* 93:738-46.
- 633 42. Mueller JC. 2004. Linkage disequilibrium for different scales and applications. *Brief*  
634 *Bioinform* 5:355-64.
- 635

636

637 **Table 1: Nucleotide and amino acid differences between A/wildbird/California/187718-**  
 638 **36/2008 (H3N8) and A/mallard/Colorado/P66F1-5/2008 (H4N6) viruses.**

| Segment | % Nucleotide identity | Protein       | % Amino acid identity | 639 |
|---------|-----------------------|---------------|-----------------------|-----|
| PB2     | 91.3                  | PB2           | 98.8                  | 640 |
| PB1     | 94.3                  | PB1<br>PB1-F2 | 99.2<br>85.6          | 641 |
| PA      | 87.7                  | PA<br>PA-X    | 98.3<br>98.4          | 642 |
| HA      | 65.0                  | HA            | 68.7                  | 643 |
| NP      | 93.7                  | NP            | 100                   |     |
| NA      | 55.6                  | NA            | 44.2                  | 644 |
| M       | 98.2                  | M1<br>M2      | 100<br>99.0           | 645 |
| NS      | 94.6                  | NS1<br>NEP    | 98.7<br>100           | 646 |

647

648 **Table 2: Primers used for viral genotyping**

| Primer name | Sequence               |
|-------------|------------------------|
| PB2 F       | CATGCTGGGAGCAAATGTACA  |
| PB2 R       | TCTTACTATGTTCTGGCAGC   |
| PB1 F       | GGAACAGGATACACCATGGA   |
| PB1 R       | GTTGTCCATTTCCCCTTTTCTG |
| PA F        | GGGATTCCTTTCGTCAGTC    |
| PA R        | GCCTGCGCATGGTTC        |
| NP F        | AGGGCACTTGTGCGTACT     |
| NP R        | CCTTTCACTGCTGCTCCA     |
| M F         | GCATCGGTCTCACAGACA     |
| M R         | CCTGCCATTTGCTCCATG     |
| NS F        | GAATCCGACGAGGCACT      |
| NS R        | TGGGCATGAGCATGAACC     |
| H3 F        | AAATGGAGGGAGTGGAGCTT   |
| H3 R        | TGAACTCCCCACACGTACAA   |
| H4 F        | CTGCCCAGGAATTAGTGGAA   |
| H4 R        | TCTGGCACATCAAATGGGTA   |
| N8 F        | TGAAAGACCGGAGCCCCTAT   |
| N8 R        | AGGGCCCGTTACTCCAATTG   |
| N6 F        | TTGGGAAATGGGGCAAGCA    |
| N6 R        | GCCTTCCCTTGTACCAGACC   |

649



# Figure 1

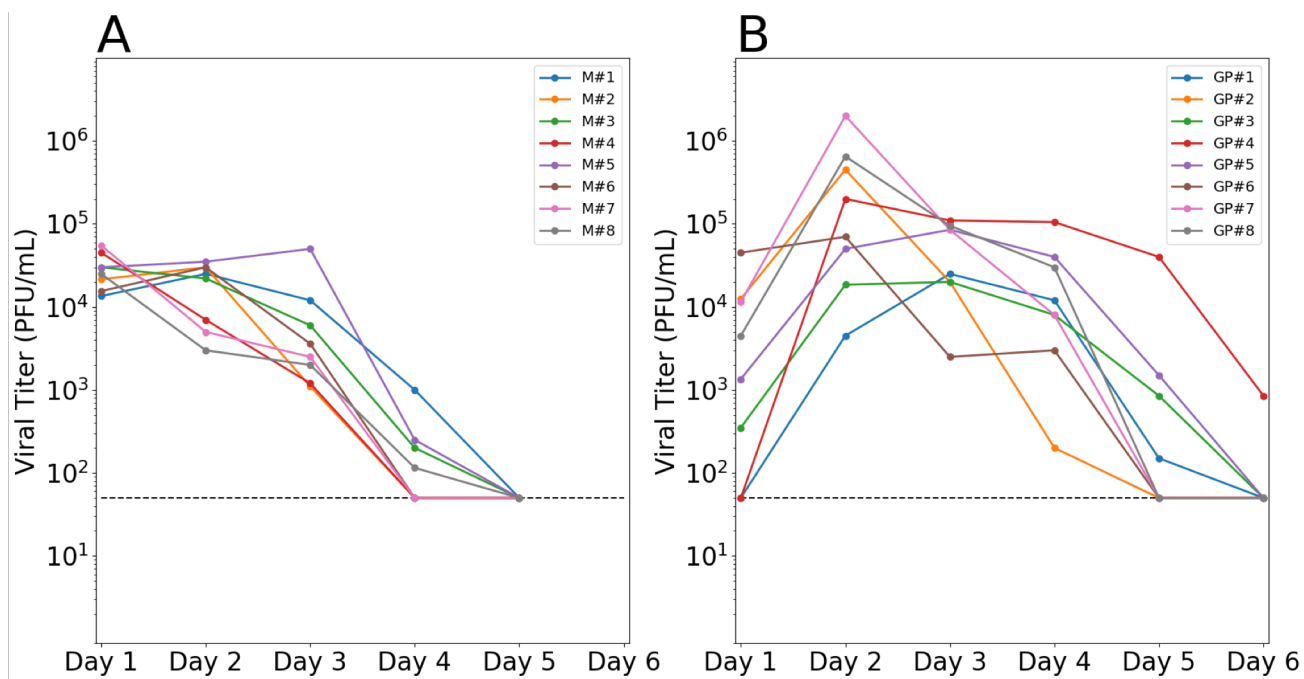

# Figure 2

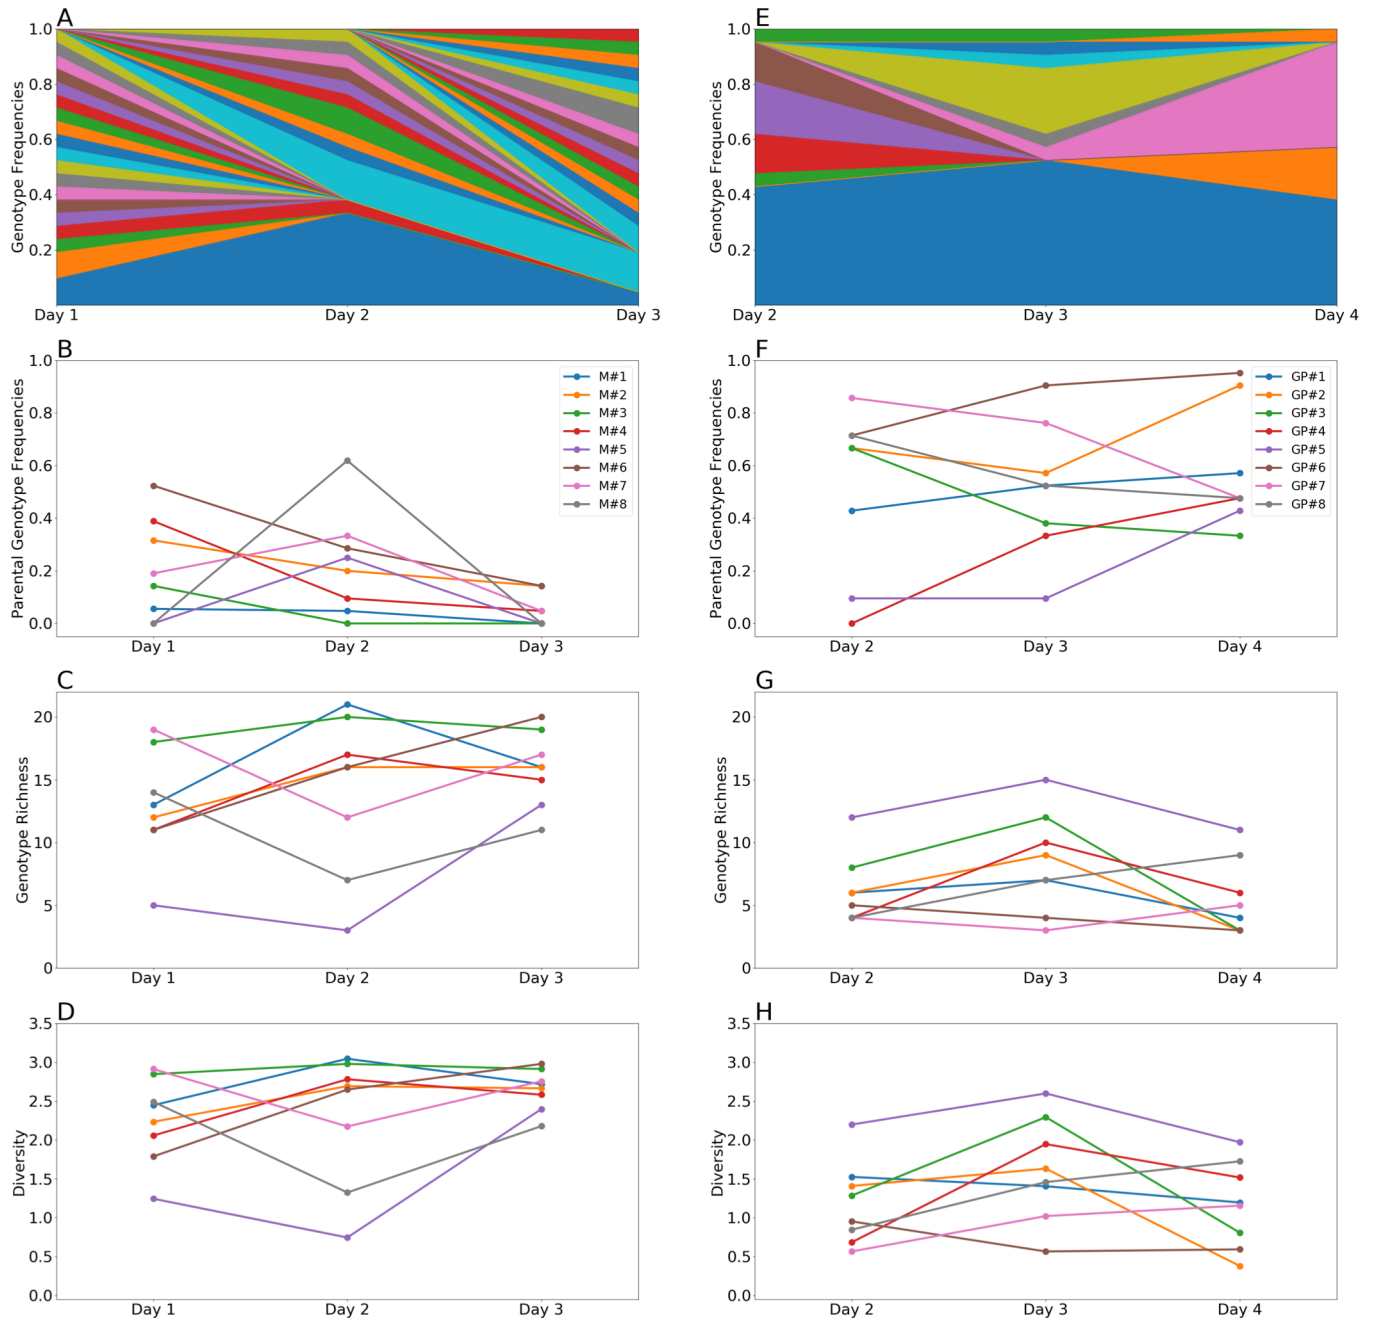

# Figure 3

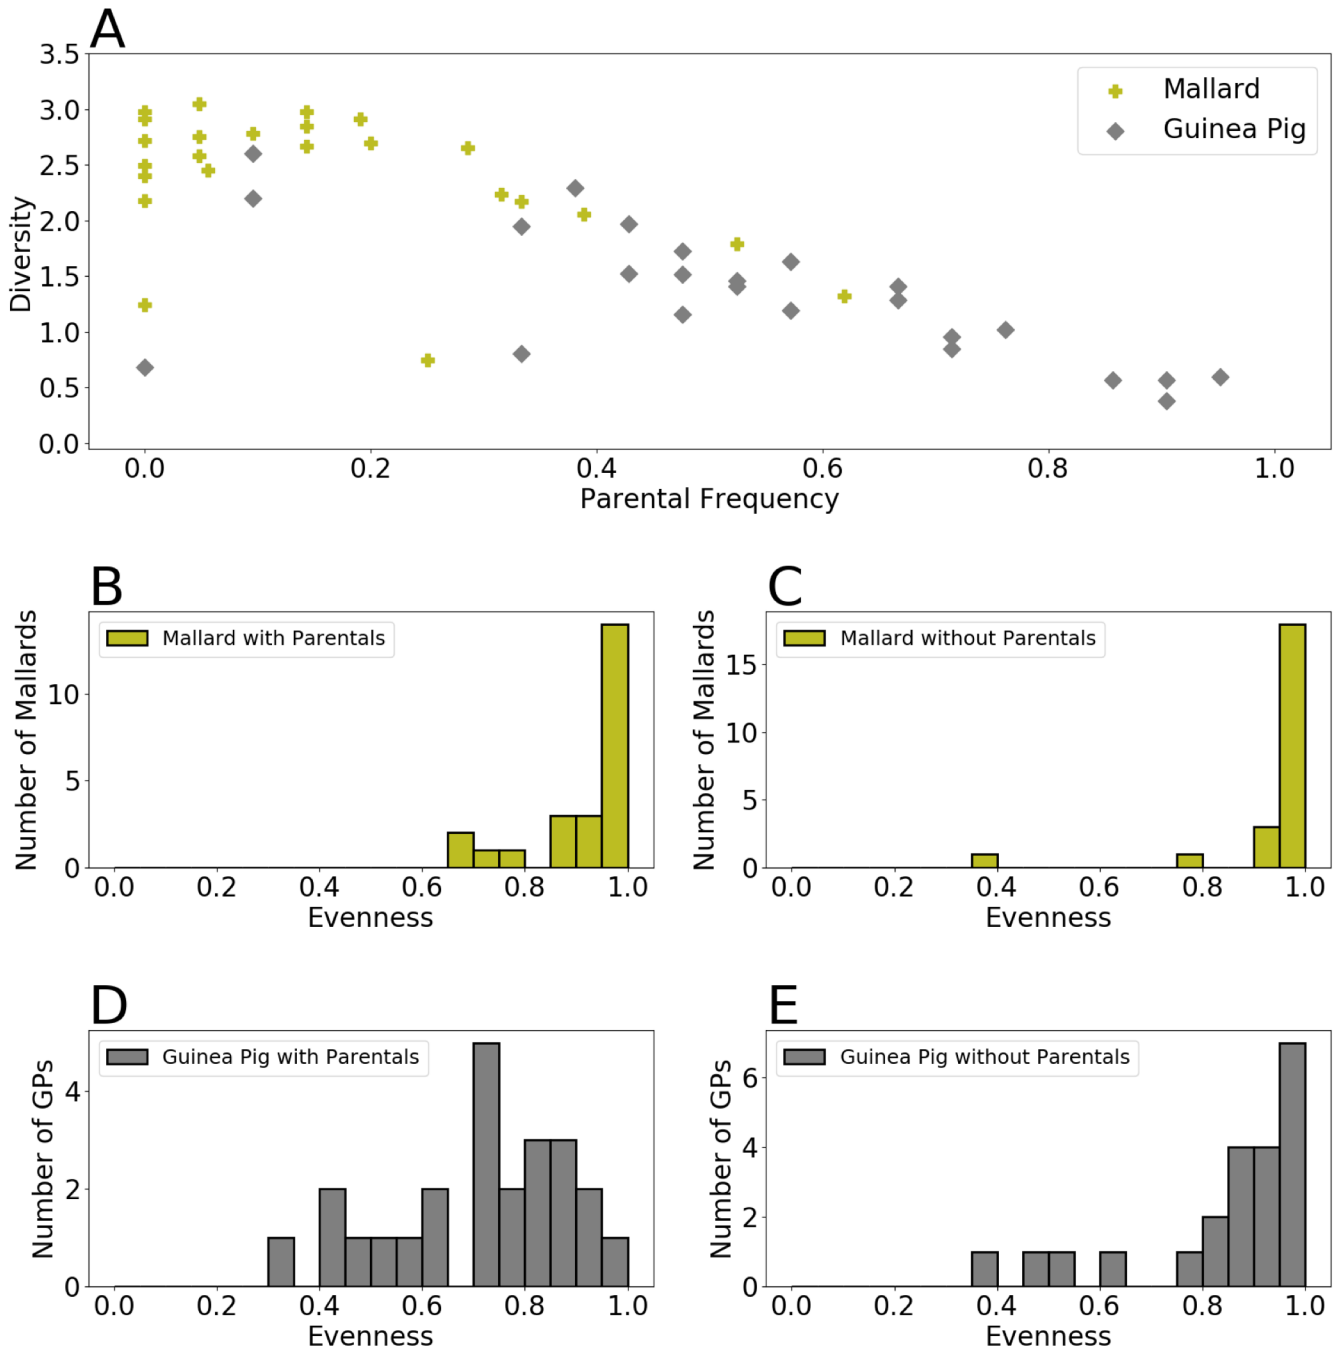

# Figure 4

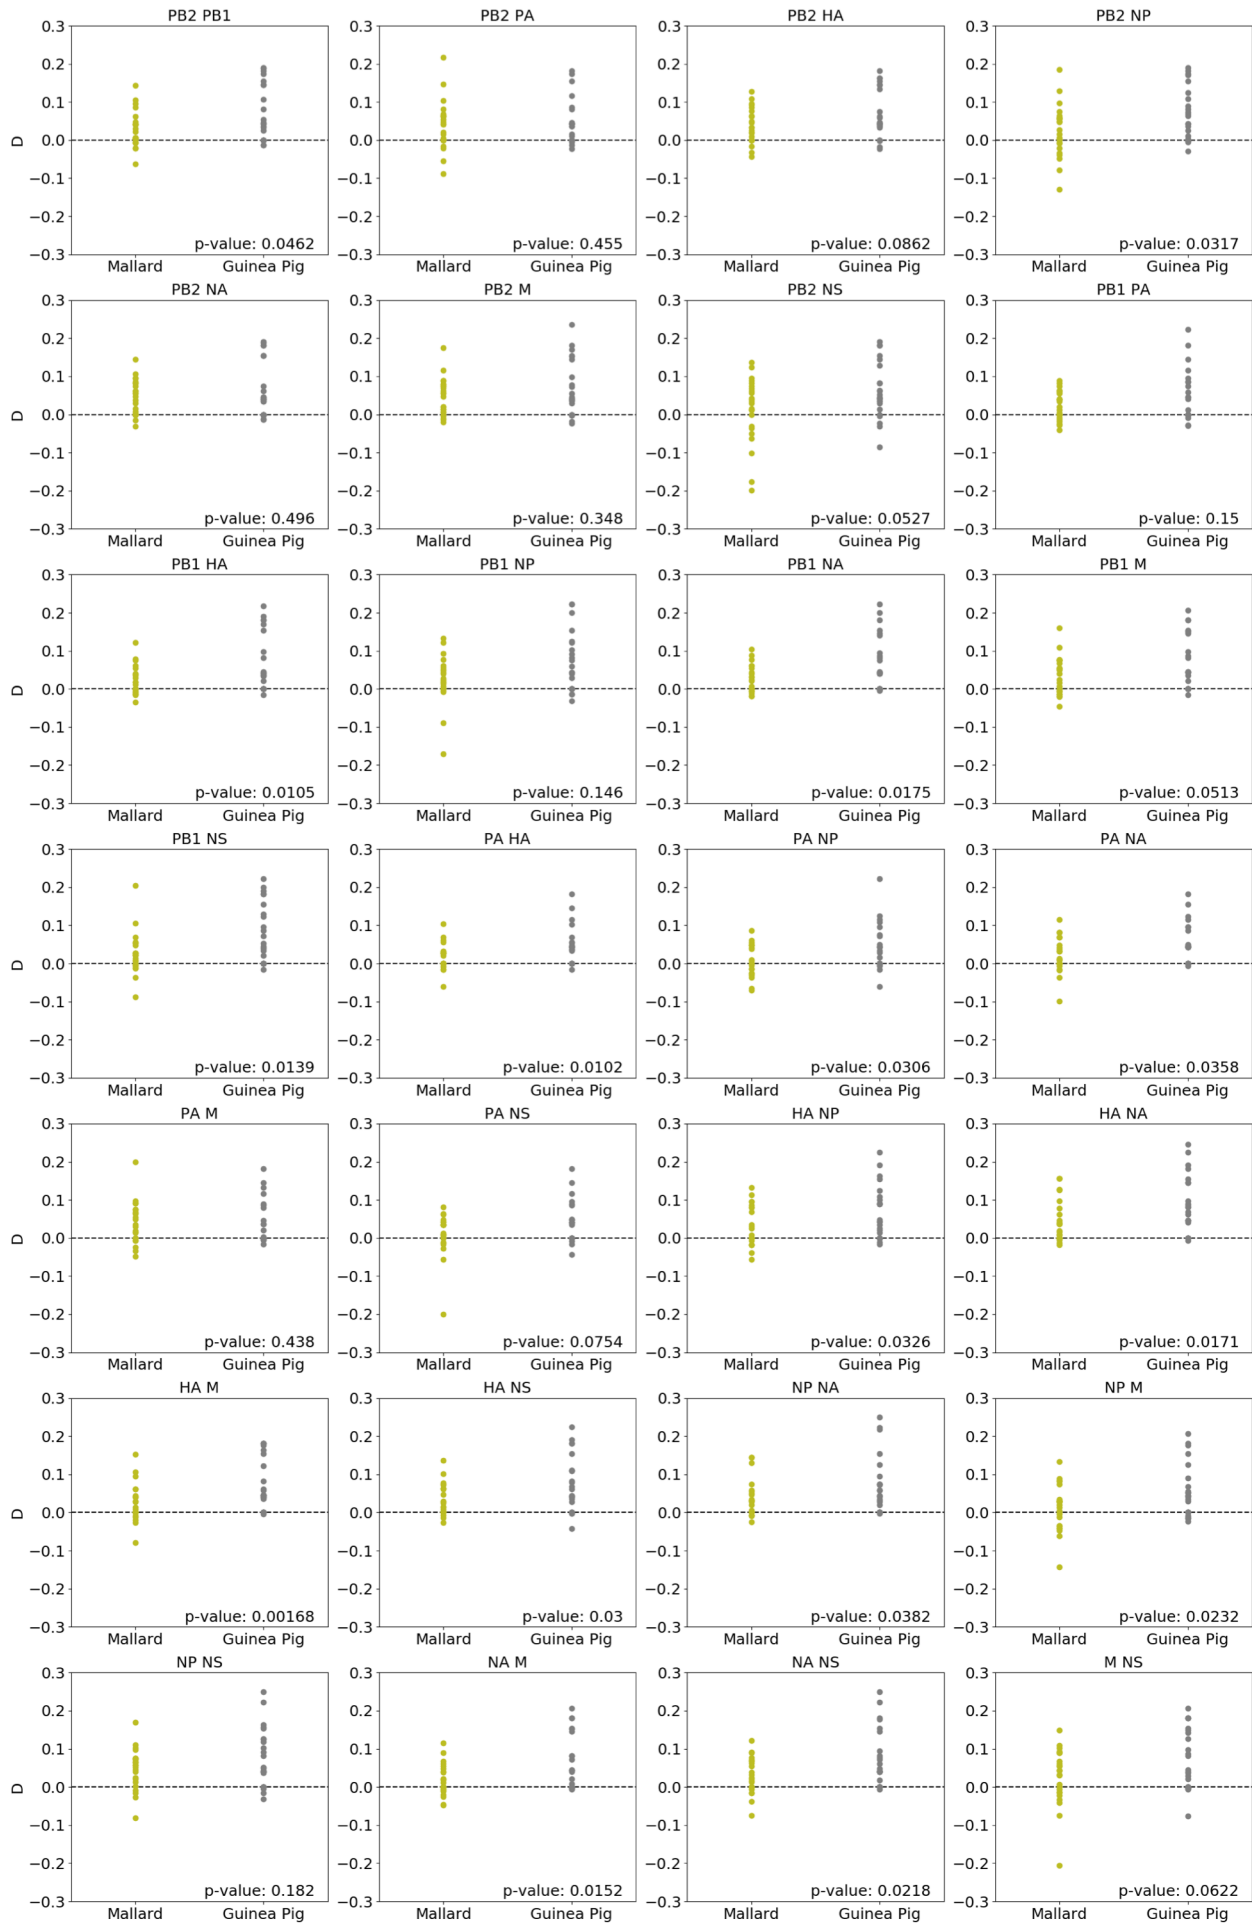

# Figure 5

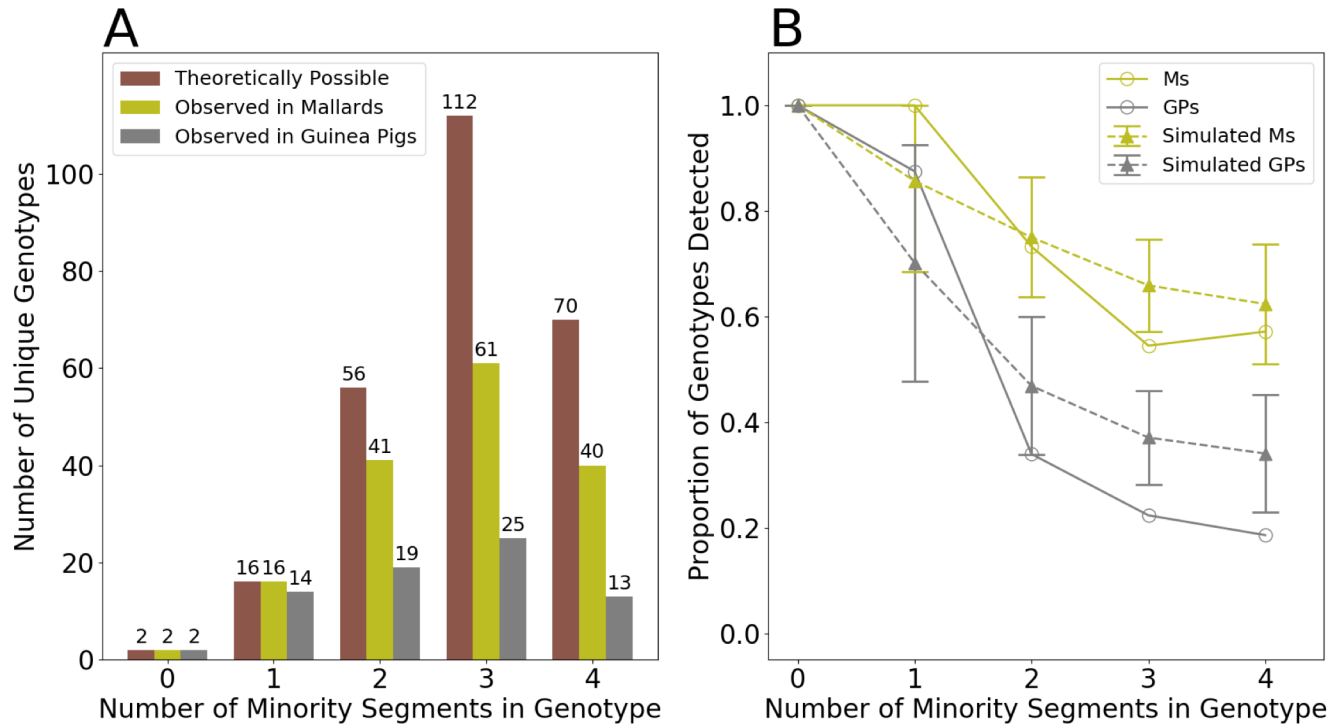

Source: https://biorxiv.org/content/10.1101/2021.02.08.430042v1.full.pdf
